# Supplementary material for: The dorsal aortic compartment is a developmental source of brown adipose tissue in mice
Source: Springer Nature journal article supplement (doi:10.1038/s41467-025-68147-9), 2026-01-07
Supplement: MOESM1 [file 41467_2025_68147_MOESM1_ESM.pdf › 41467_2025_68147_MOESM1_ESM.pdf]

## **The dorsal aortic compartment is a source of brown adipose tissue**

Sophie Heider, Cornelius Fischer, Ali Kerim Secener, Pedro Vallecillo-Garcia, Georgios Kotsaris, Zarah G. Meisen, Verena Pawolski, Claudia Giesecke-Thiel, Thomas Conrad, Tim J. Schulz, Sascha Sauer and Sigmar Stricker

### **Supplementary Figures and Tables**

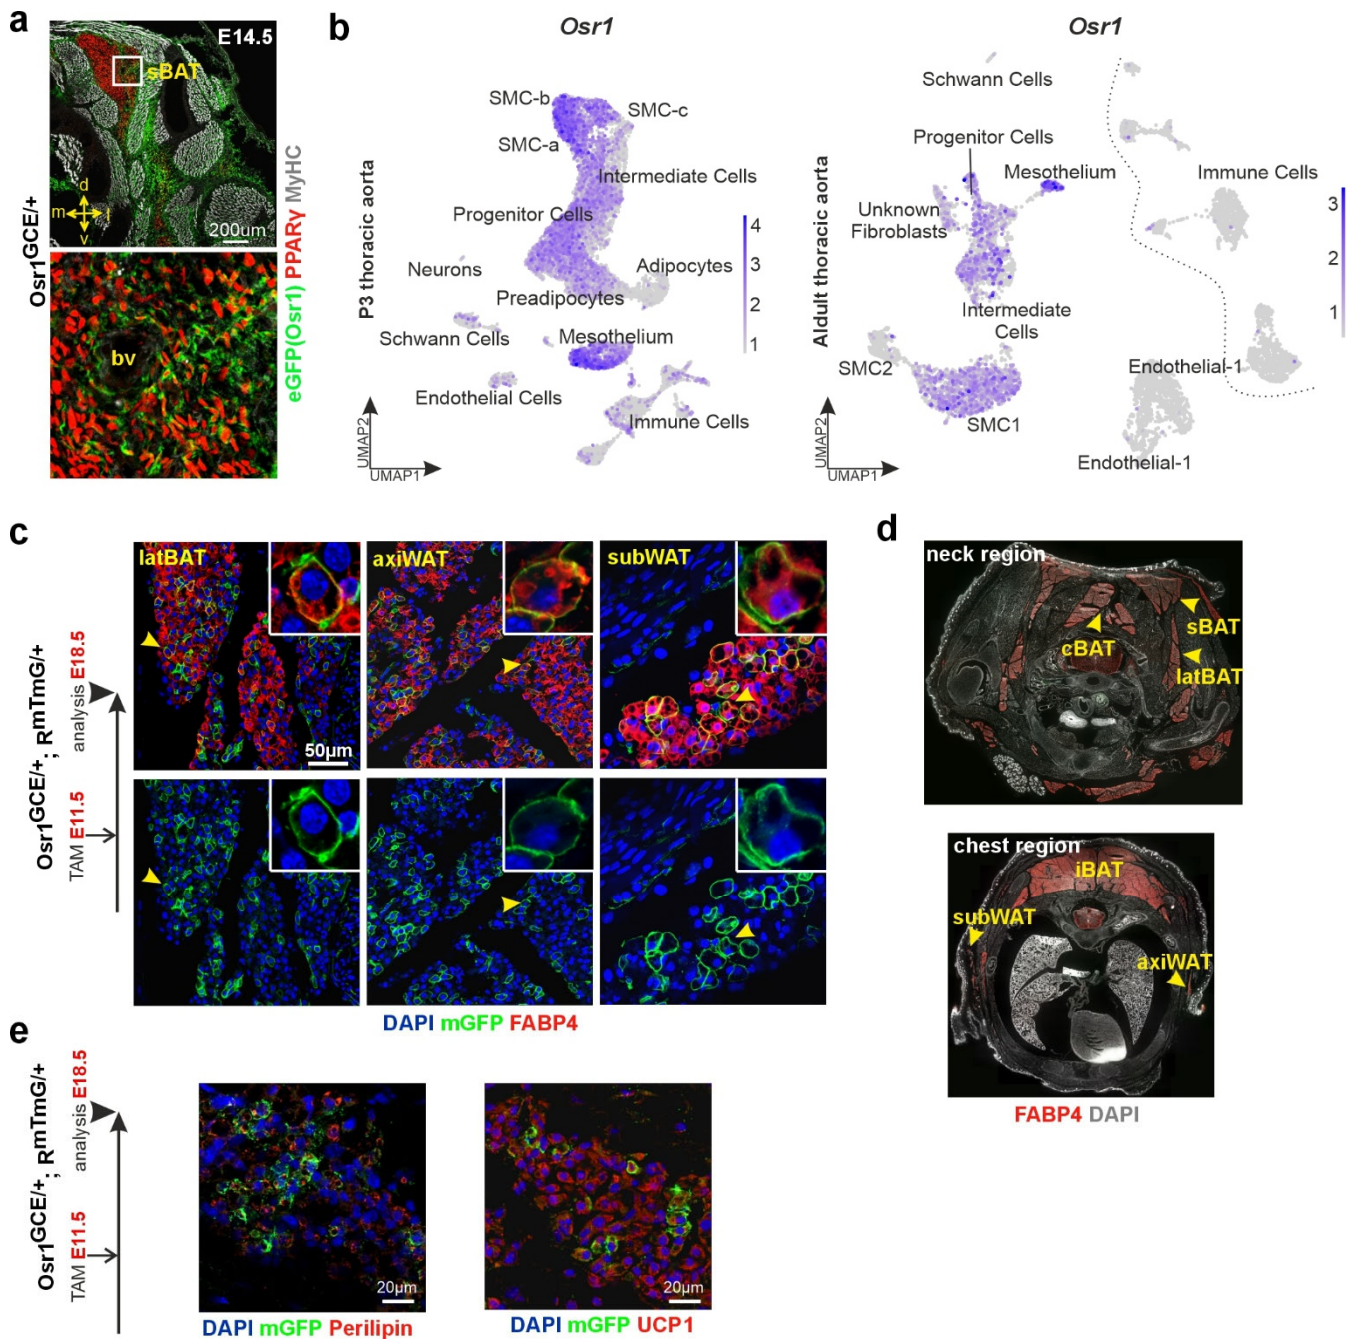

### Supplementary Figure 1

**a)** Immunolabeling of sections of E14.5 *Osr1*<sup>GCE/+</sup> embryos for eGFP (Osr1 reporter; green), PPAR $\gamma$  (preadipocytes; red) and MyHC (muscle; white). Boxed regions are shown as magnifications. sBAT: subscapular BAT; bv: blood vessel; representative image of n=4.

**b)** Feature plots showing *Osr1* expression in single-cell sequencing datasets of P3 and adult thoracic aorta-associated adipose tissue; data cluster annotation taken from Angueira et al. 2021 (Ref. 27).

**c)** Genetic lineage tracing of E11.5 *Osr1*<sup>+</sup> cells to E18.5 (schematic depiction left) using *Osr1*<sup>GCE/+</sup>; *R<sup>mTmG</sup>/+* embryos; representative images of n=3. Detail images from latBAT: lateral BAT; axiWAT: axillary WAT and subWAT: subcutaneous WAT depots are shown, tissue sections were labeled for mGFP (Osr1 lineage; green), FABP4 (adipocytes; red) and DAPI (nuclei; blue).

**d)** Overview of adipose tissue depots that develop prenatally; cross sections of E18.5 mouse embryos, adipocytes labelled by FABP4 and DAPI (nuclei; white); representative images of n=3.

**e)** Genetic lineage tracing of E11.5 *Osr1*<sup>+</sup> cells to E18.5 using *Osr1*<sup>GCE/+</sup>; *R<sup>mTmG</sup>/+* embryos. Detail image from sBAT depot is shown, tissue sections were labeled for mGFP (Osr1 lineage; green), DAPI (nuclei; blue) and Perilipin (red, left image), or UCP1 (red, right image); representative images of n=3 for both panels.

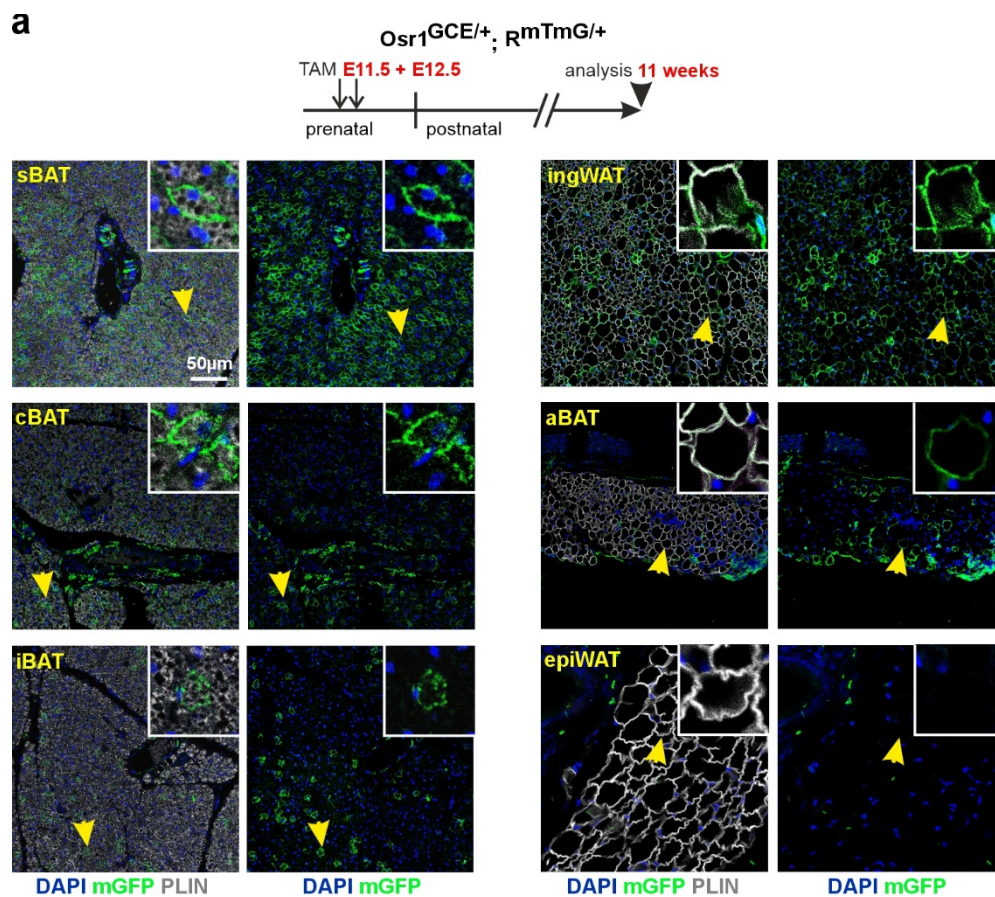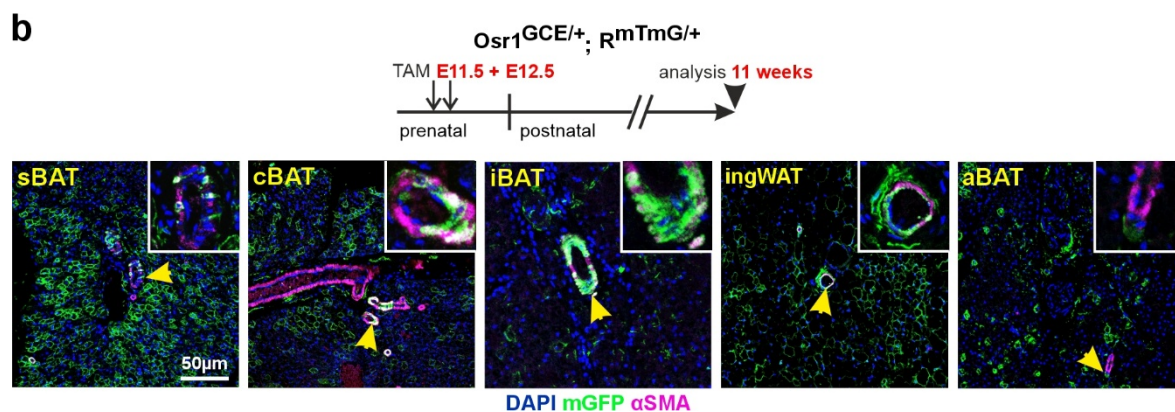

### Supplementary Figure 2

**a, b**) Genetic lineage tracing of E11.5  $Osr1^{+}$  cells to E18.5 using  $Osr1^{GCE/+}; R^{mTmG/+}$  embryos. Indicated BAT and WAT depots are shown, tissue sections were labeled for mGFP ( $Osr1$  lineage; green), DAPI (nuclei; blue). and in **a**) Perilipin (adipocytes; white), or in **b**) alpha-smooth muscle actin ( $\alpha$ SMA, red). Arrowheads indicate cells shown in magnification inserts. Representative images of  $n=2$  in both panels.



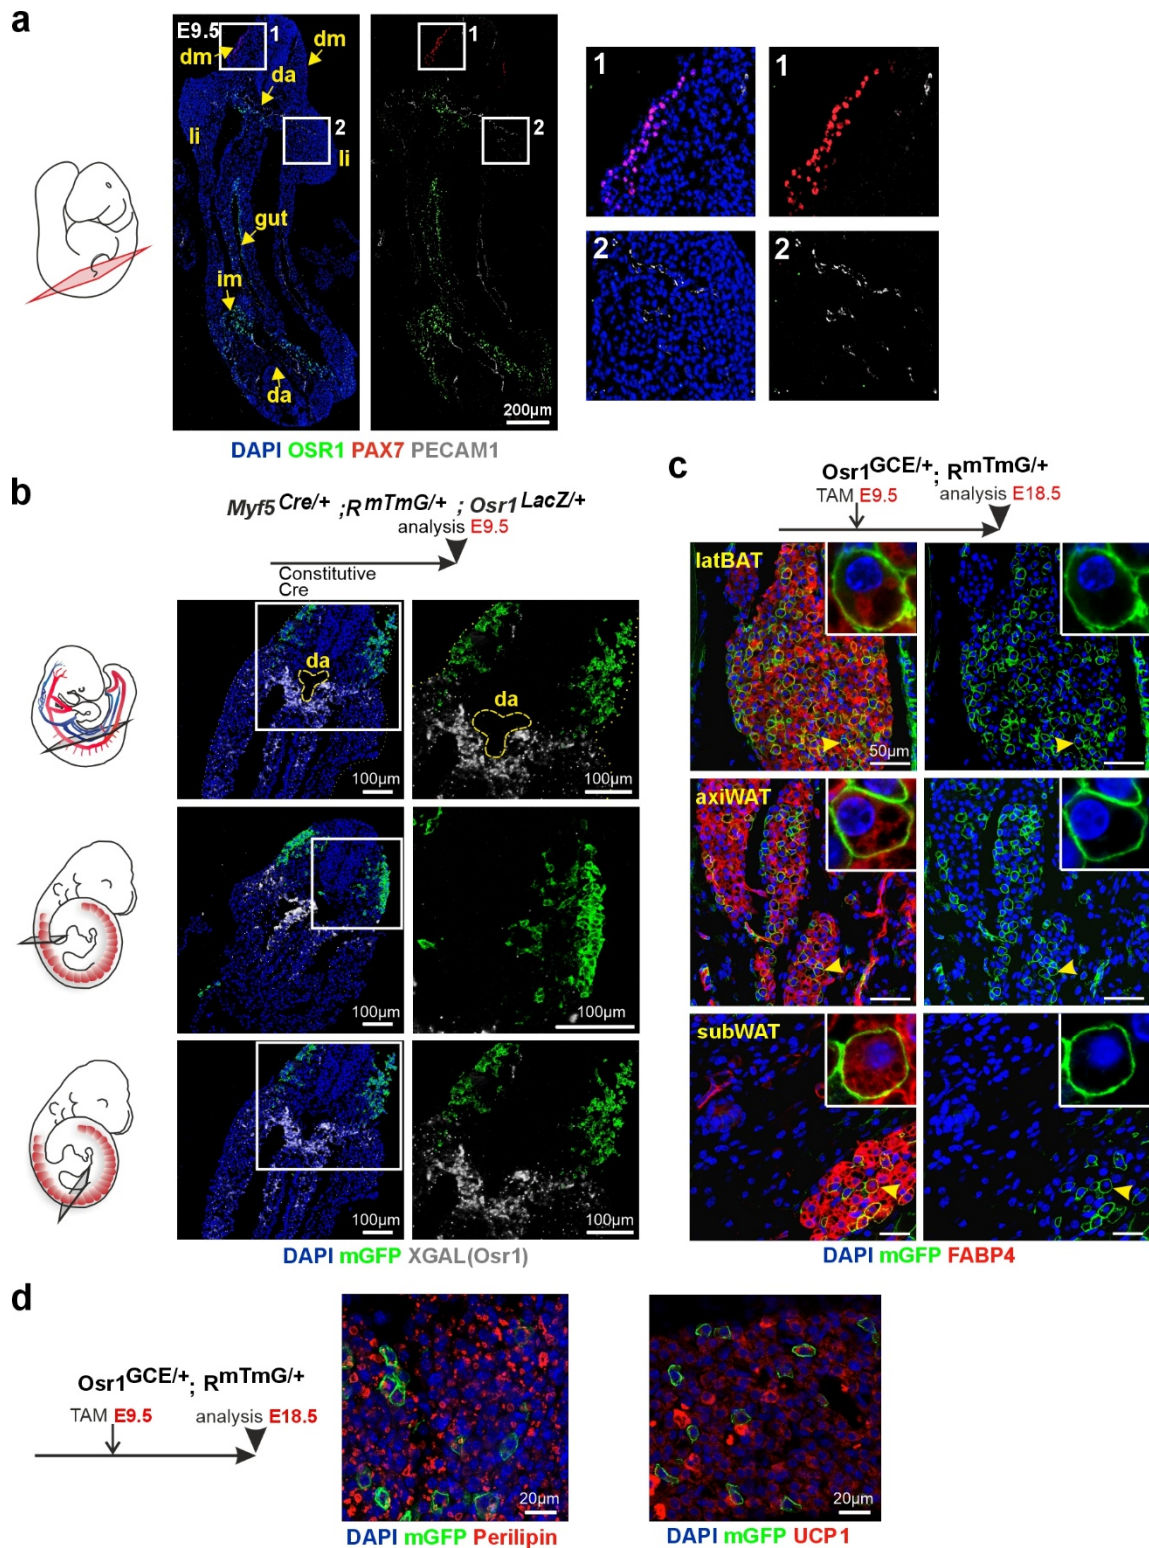

### Supplementary Figure 3

**a)** Section of E9.5 wild type mouse embryos at indicated level labelled for OSR1 (green), PAX7 (red), PECAM1 (white) and DAPI (nuclei; blue); representative image of n=3. Boxed areas (1: somite region; 2: limb bud) shown as magnification right. Abbreviations: da: dorsal aorta; dm: dermomyotome; im: intermediate mesoderm; li: limb buds.

**b)** Genetic lineage tracing of *Myf5*<sup>+</sup> cells, see schematic depiction. Tissue sections were labeled for mGFP (*Myf5* lineage, green), XGAL (*Osr1* expression from *Osr1*-LacZ reporter allele, white) and DAPI (nuclei, blue); representative images of n=3.

**c)** Genetic lineage tracing of E9.5 *Osr1*<sup>+</sup> cells to E18.5 (schematic depiction left) using *Osr1*<sup>GCE/+</sup>; *RmTmG*<sup>+/+</sup> embryos. Indicated BAT and WAT depots are shown, tissue sections were labeled for mGFP (*Osr1* lineage; green), FABP4 (adipocytes; red) and DAPI (nuclei; blue). Arrowheads indicate cells shown in magnification inserts; representative images of n=3.

**d)** Genetic lineage tracing of E9.5 *Osr1*<sup>+</sup> cells to E18.5 using *Osr1*<sup>GCE/+</sup>; *RmTmG*<sup>+/+</sup> embryos. Detail image from sBAT depot is shown, tissue sections were labeled for mGFP (*Osr1* lineage; green), DAPI (nuclei; blue) and Perilipin (red, left image), or UCP1 (red, right image); representative images of n=3 for both panels.



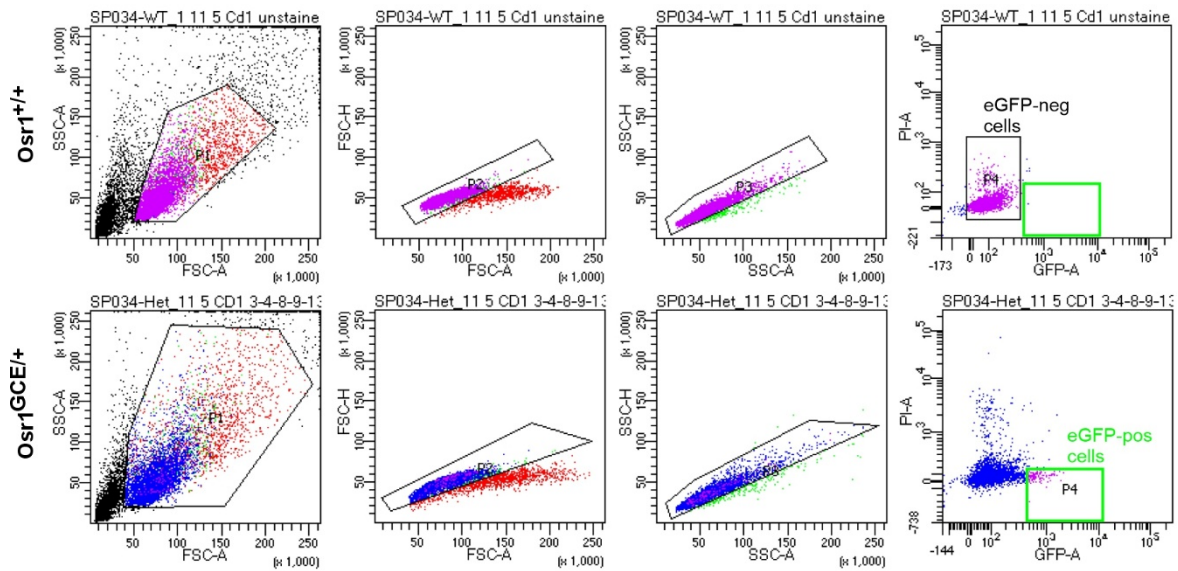

**Supplementary Figure 4**

**a)** FACS strategy for isolation of eGFP+ cells from *Osr1<sup>GCE/+</sup>* embryos compared to a wild type embryo (*Osr1<sup>+/+</sup>*) from the same litter.

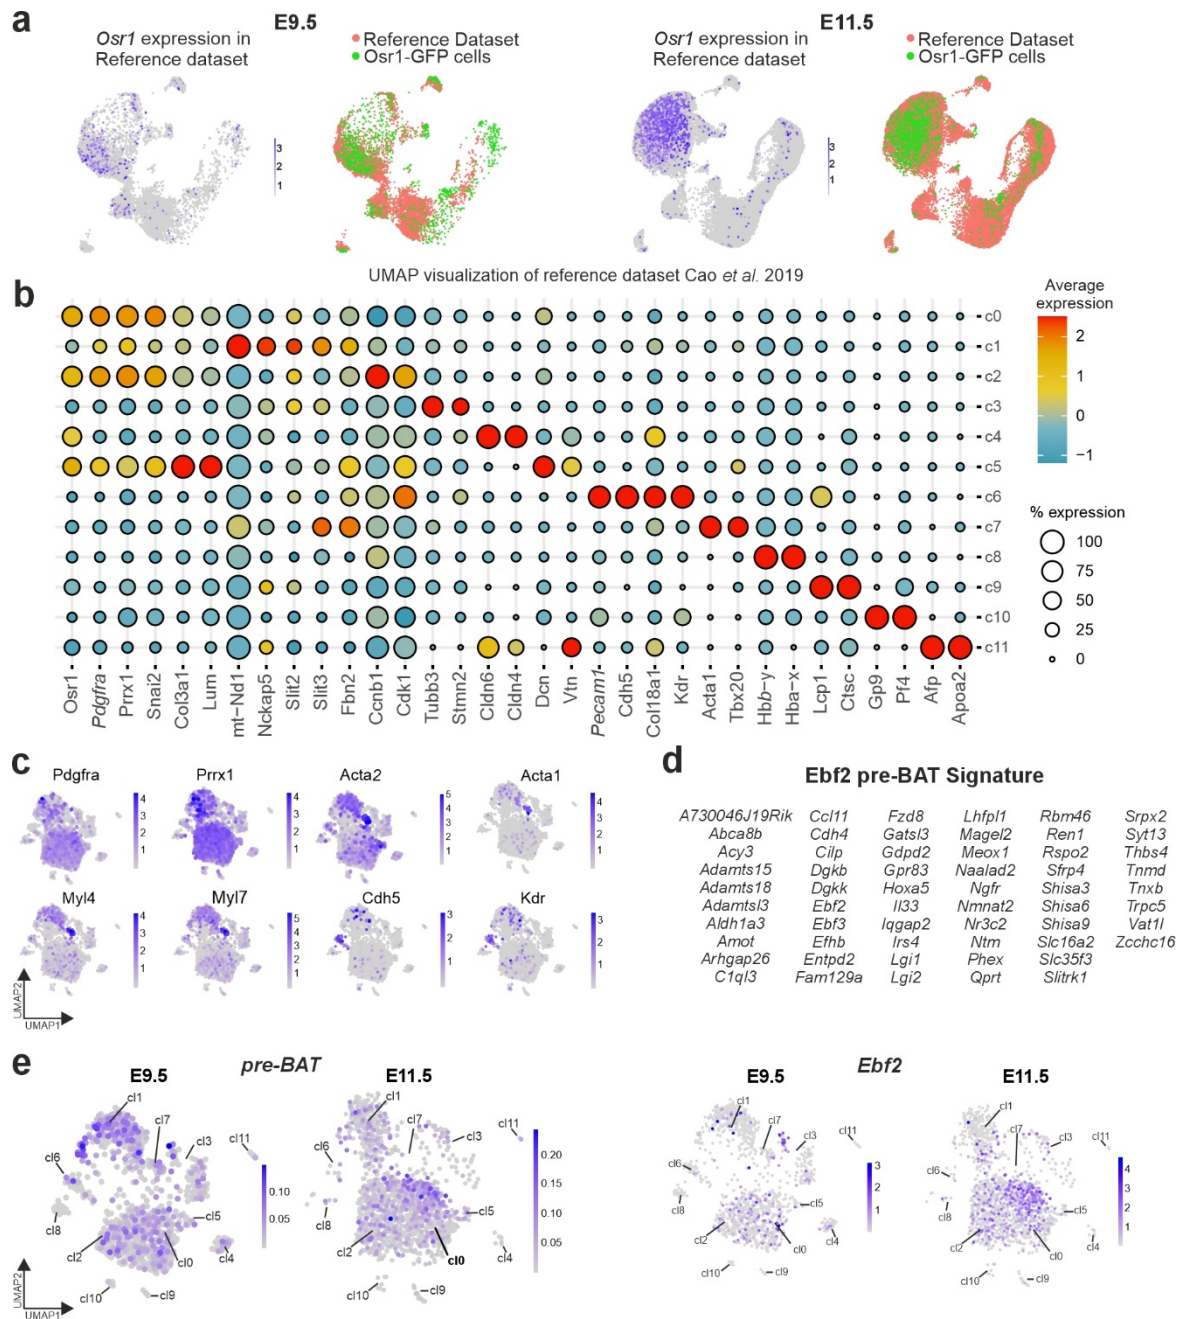

### Supplementary Figure 5

- a)** Feature plots show mapping of *Osr1*-eGFP single-cell sequencing datasets (E9.5 and E11.5) to the reference whole embryo dataset from Cao *et al.* 2019, compared to *Osr1* expression in this dataset.
- b)** Dot plot depiction of cluster-defining marker genes of the combined dataset clusters.
- c)** Feature plots showing expression of indicated genes in the combined E9.5 and E11.5 *Osr1*-eGFP dataset.
- d)** List of genes defining the *Ebf2* cell pre-BAT signature (from Wang *et al.* 2014).
- e)** Feature plots show mapping of *Ebf2* cell pre-BAT signature (left) and *Ebf2* expression (right) in the E9.5 and E11.5 *Osr1*-eGFP datasets, respectively.



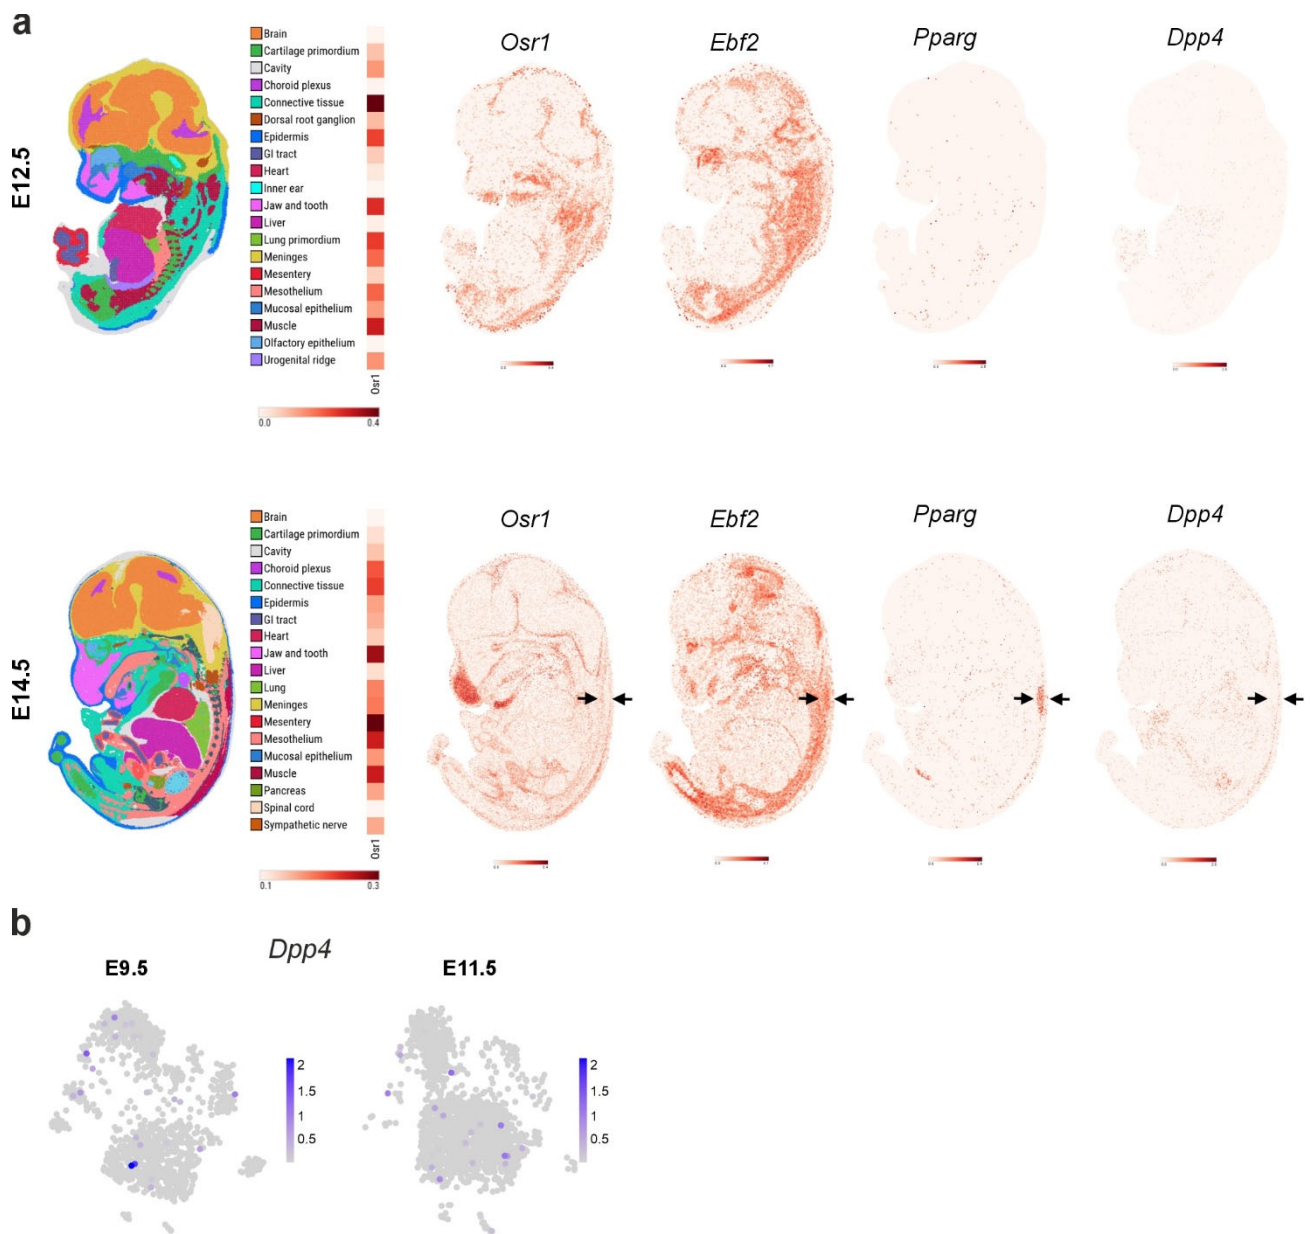

### Supplementary Figure 6

**a)** Mapping of *Osr1* expression on an E12.5 and E14.5 embryo sections of the MOSTA atlas; *Ebf2* and *Pparg* are shown for comparison. Cell type annotation and heatmap depiction of *Osr1* expression shown left. Arrowheads point out prospective BAT indicated by *Pparg* expression detectable at E14.5.

**b)** Feature plots showing expression of *Dpp4* in the E9.5 and E11.5 *Osr1*-eGFP datasets, respectively.

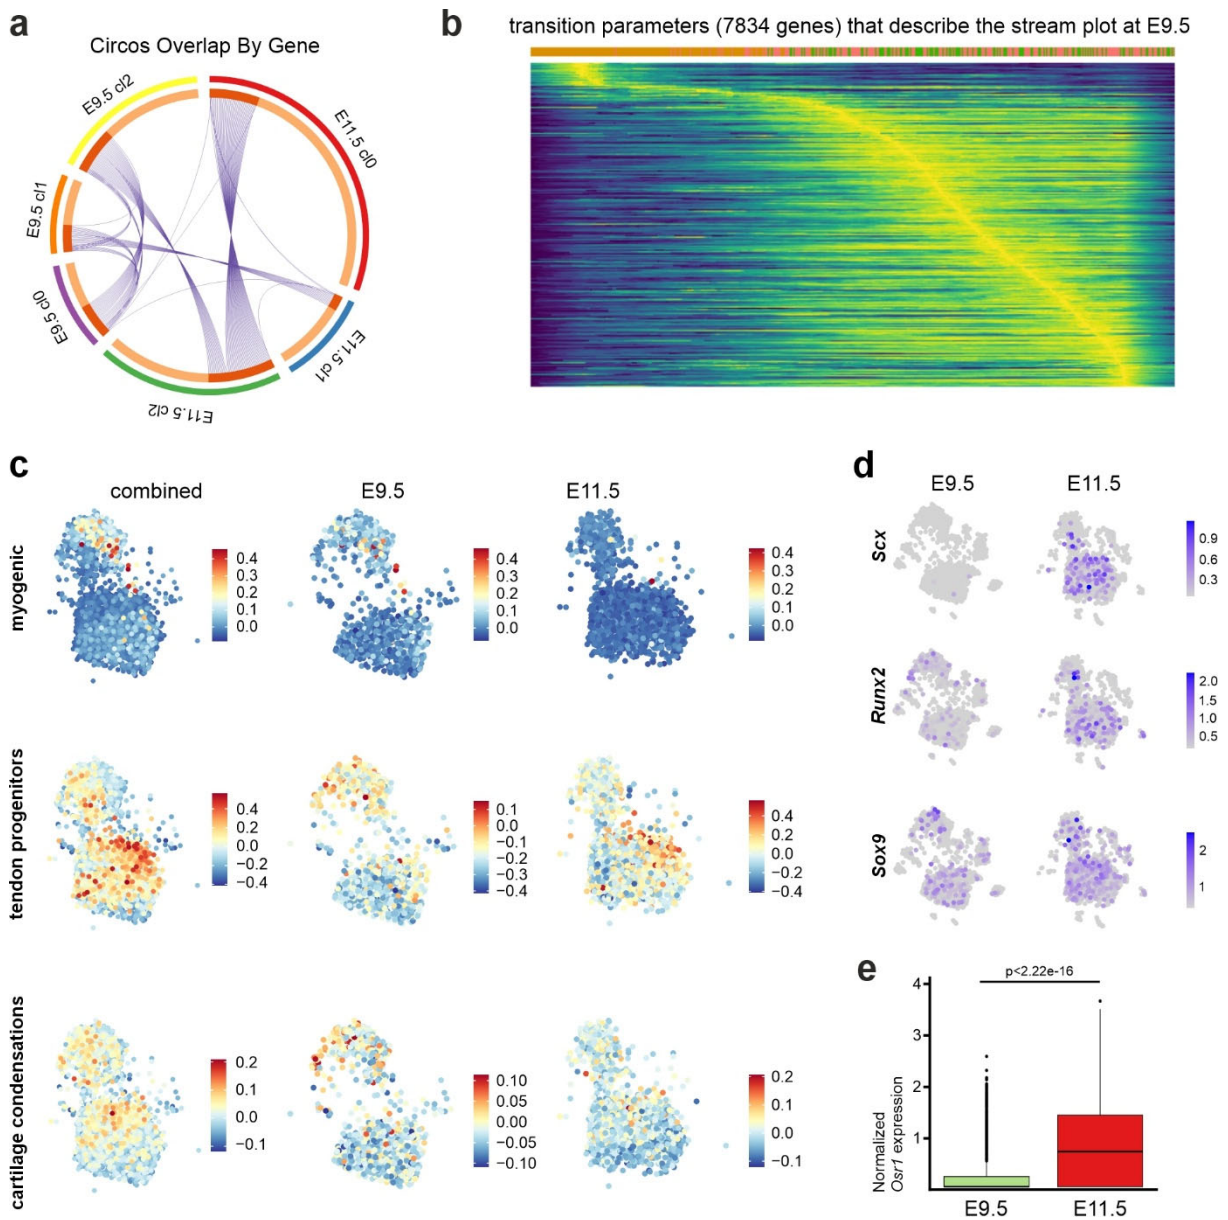

### Supplementary Figure 7

- a)** Metascape based gene overlay analysis compares the cluster enriched genes ( $2\log_{2}FC \geq 0.5$ ) of cl0, cl1 and cl2 of Osr1-GFP E9.5 and E11.5 datasets.
- b)** STREAM based generated plot of genes that describe the inferred trajectory of cl1 into cl0 and cl2 within the Osr1-GFP E9.5 dataset
- c)** Feature plots show module scores of myogenic, tenogenic and chondrogenic progenitor cells derived from Rouco et al. 2021 in the E9.5 and E11.5 Osr1+ cell datasets that were reduced to clusters 0, 1 and 2.
- d)** Feature plots show gene expression patterns of *Scx*, *Runx2* and *Sox9* in the Osr1+ cell datasets at E9.5 and E11.5
- e)** Whisker plot depicting normalized *Osr1* expression levels in the E9.5 vs. the E11.5 datasets.



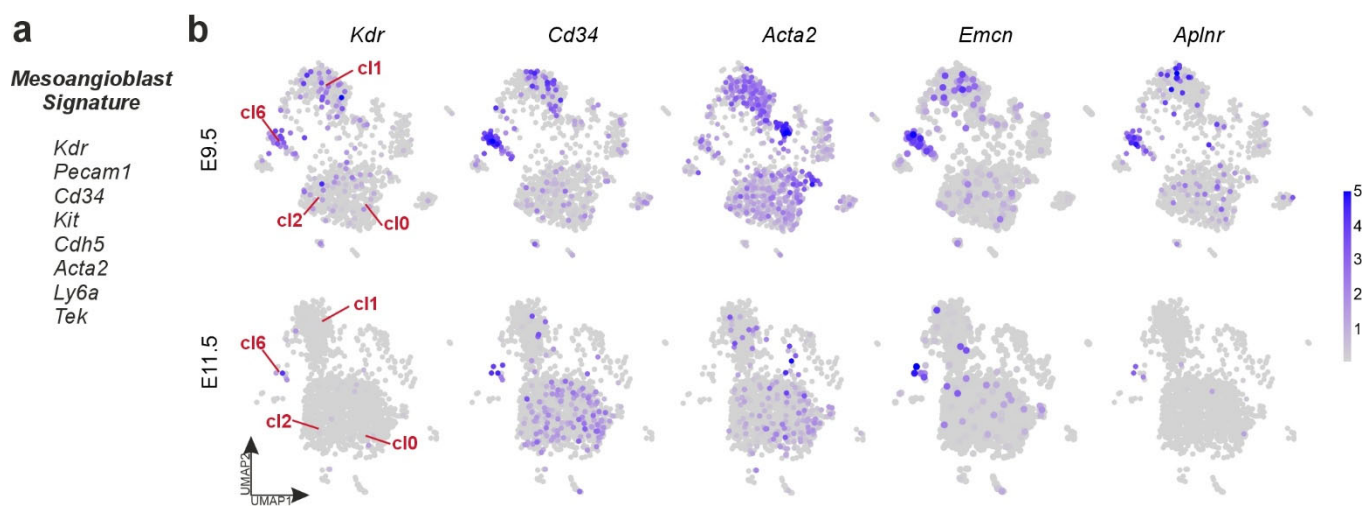

**Supplementary Figure 8**

**a)** List of genes describing the mesoangioblast signature.

**b)** Feature plots showing expression of *Kdr*, *Cd34*, *Acta2*, *Emcn* and *Aplnr* in the E9.5 vs. E11.5 Osr1-eGFP dataset.

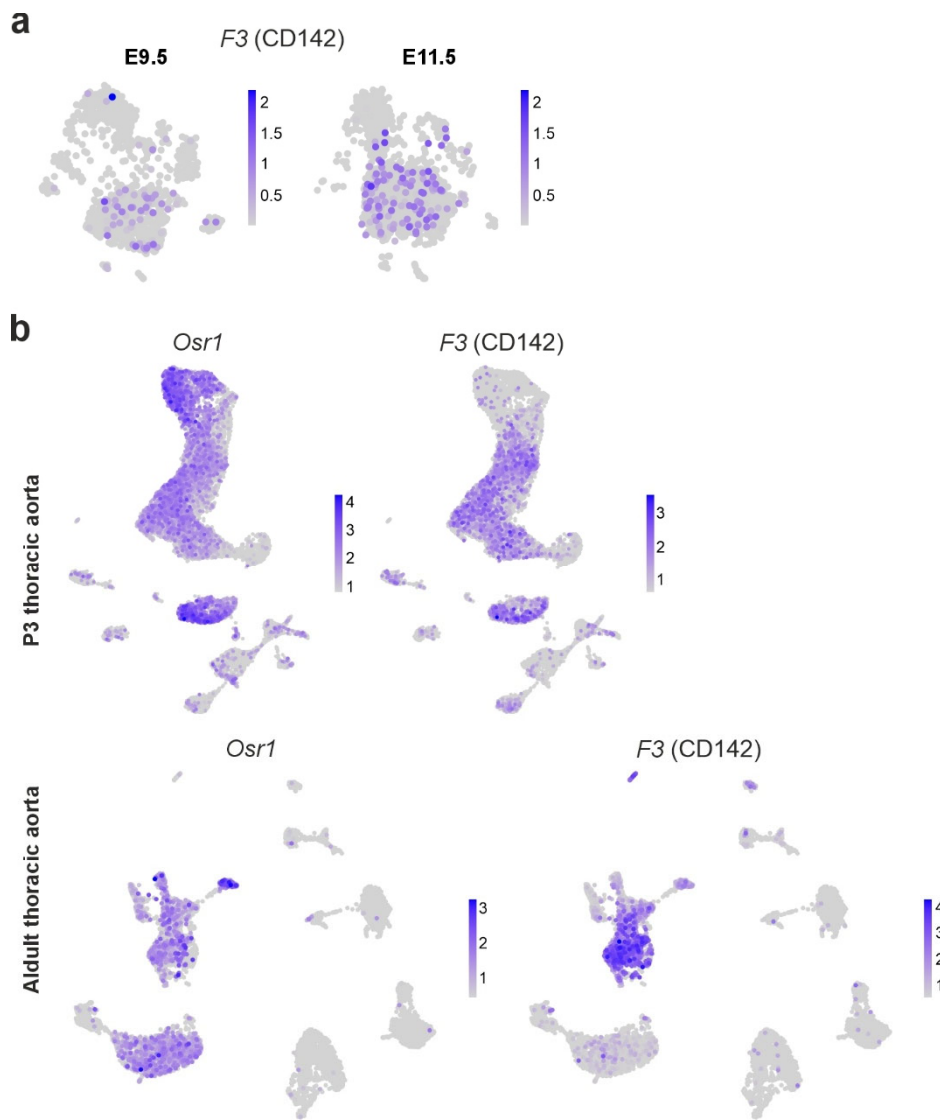

### Supplementary Figure 9

**a)** Feature plots show expression of *F3* (CD142) in the E9.5 and E11.5 *Osr1*-eGFP datasets, respectively.

**b)** Feature plots showing *Osr1* and *F3* (CD142) expression in single-cell sequencing datasets of P3 (top) and adult thoracic aorta-associated adipose tissue (bottom); data cluster annotation taken from Angueira et al. 2021 (Ref. 27).



**Supplementary Table 1**

| Antibodies                             |                                           |                                                     |          |
|----------------------------------------|-------------------------------------------|-----------------------------------------------------|----------|
| name                                   | supplier                                  | catalog                                             | dilution |
| Rabbit anti-PPAR $\gamma$              | Cell Signaling Technology                 | Cat# 2443 RRID:AB_823598                            | 1:100    |
| Rabbit anti-OSR1                       | Sigma-Aldrich                             | Cat# HPA015525 RRID:AB_1854822                      | 1:100    |
| Chicken anti-GFP                       | Aves Labs                                 | Cat# GFP-1020 RRID:AB_10000240)                     | 1:800    |
| Rabbit anti-FABP4                      | Abcam                                     | Cat# ab66682 RRID:AB_1310219                        | 1:300    |
| Guinea pig anti-PAX7                   | C. Birchmeier, Max Delbrück Centre Berlin | Zhang et al. 2021 doi : 10.1038/s41467-021-21631-4) | 1:100    |
| Mouse anti-Myosin Heavy Chain          | Millipore                                 | Cat# 05-716-I RRID:AB_309930                        | 1:800    |
| Sheep anti-EBF2                        | R&D Systems                               | Cat# AF7006 RRID:AB_10972102                        | 1:20     |
| Hamster anti-PECAM1                    | DSHB                                      | Cat# 2H8 RRID:AB_2161039                            | 1:250    |
| Rabbit anti- $\alpha$ -SMA             | Abcam                                     | Cat# ab5694 RRID:AB_2223021                         | 1:250    |
| Rabbit anti-Perilipin A/B              | Sigma-Aldrich                             | Cat# P1873 RRID:AB_532267                           | 1:300    |
| Rabbit anti-UCP1                       | Sigma-Aldrich                             | Cat# U6382 RRID:AB_261838                           | 1:200    |
| Donkey anti-rabbit, Alexa Fluor 488    | Thermo Fisher Scientific                  | Cat# A32790 RRID:AB_2762833                         | 1:500    |
| Donkey anti-rabbit, Alexa Fluor 568    | Thermo Fisher Scientific                  | Cat# A10042 RRID:AB_2534017                         | 1:500    |
| Donkey anti-rabbit, Alexa Fluor 647    | Thermo Fisher Scientific                  | Cat# A32795 RRID:AB_2762835                         | 1:500    |
| Donkey anti-mouse, Alexa Fluor 568     | Thermo Fisher Scientific                  | Cat# A10037 RRID:AB_11180865                        | 1:500    |
| Donkey anti-mouse, Alexa Fluor 680     | Thermo Fisher Scientific                  | Cat# A32788 RRID:AB_2762831                         | 1:500    |
| Goat anti-hamster, Alexa Fluor 568     | Thermo Fisher Scientific                  | Cat# A78960 RRID:AB_2925783                         | 1:500    |
| Goat anti-hamster, Alexa Fluor 647     | Thermo Fisher Scientific                  | Cat# A78962 RRID:AB_2925785                         | 1:500    |
| Goat anti-guinea pig, Alexa Fluor 568, | Thermo Fisher Scientific                  | Cat# A-11075 RRID:AB_2534119                        | 1:500    |
| Goat anti-guinea pig, Alexa Fluor 647  | Thermo Fisher Scientific                  | Cat# A-21450 RRID:AB_2535867                        | 1:500    |
| Anti-sheep Alexa Fluor 568,            | Thermo Fisher Scientific                  | Cat# A-21099 RRID:AB_2535753                        | 1:500    |
| Goat anti-chicken, Alexa Fluor 488     | Thermo Fisher Scientific                  | Cat# A-11039 RRID:AB_2534096                        | 1:500    |
